# Supplementary material
Source: publisher figshare collection journal article supplement (https://rs.figshare.com/ndownloader/files/20691801)
Supplement: Supplementary file 1 [file 20691801]

SEM1

Figure Caption:

The overall phenological trend of the gradual change of the proportion of the developing susceptible *P. regilla* within the ‘critical window’ (dotted line) and the rising infection risk (solid line) for all sites visited in the study. Each panel represents a site. Sites within Lassen area begin at Julian date 150 as that was the day the ice melted off the majority of ponds.

SEM 2

| Model parameters  Family: binomial  Response variable: (number of malformed frogs, number of normal) | k | AIC | ∆AIC |
| --- | --- | --- | --- |
| *R. ondatrae* infection + synchrony + *R. ondatrae*:synchrony | 3 | 66.4 | 0.3 |
| *R. ondatrae* infection + Location + synchrony + *R. ondatrae*:synchrony | 4 | 66.1 | 0 |
| *R. ondatrae* infection + Location + synchrony + *R. ondatrae*:synchrony + *R. ondatrae*:Location | 5 | 67.4 | 1.3 |
| *R. ondatrae* infection + synchrony | 2 | 83.5 | 17.4 |
| *R. ondatrae* infection | 1 | 97.8 | 31.7 |

Table Caption:

Modeling outputs from all the model built to quantify the effects of phenological synchrony and infection load on malformation prevalence. The best model was determined based on log likelihood ratio test.
